# Supplementary material for: Potentially Modifiable Factors Associated with Adherence to Adjuvant Endocrine Therapy among Breast Cancer Survivors: A Systematic Review
Source: Cancers (Basel). 2020 Dec 31;13(1):107. doi: 10.3390/cancers13010107 (PMC7794693; doi:10.3390/cancers13010107)
Supplement: Supplementary file 1 [file cancers-13-00107-s001.xlsx]

## Sheet: Table S1 
Table S1. Full search strategy for Medline.
1. "breast cancer".ab,ti.
2. "breast neoplasm* ".ab,ti.
3. "breast carcinoma".ab,ti.
4. "breast tumor* ".ab,ti.
5. "breast tumour* ".ab,ti.
6. exp Breast Neoplasms/
7. 1 or 2 or 3 or 4 or 5 or 6
8. "adher*".ab,ti.
9. "medication adherence".ab,ti.
10. "medication compliance".ab,ti.
11. "nonadheren*".ab,ti.
12. "patient compliance".ab,ti.
13. exp "Treatment Adherence and Compliance"/
14. exp Medication Adherence/
15. exp Patient Compliance/
16. exp Treatment Refusal/
17. (refus* adj3 treat*).mp. [mp=title, abstract, original title, name of substance word, subject heading word, floating sub-heading word, keyword heading word, protocol supplementary concept word, rare disease supplementary concept word, unique identifier, synonyms]
18. "treatment refusal".ab,ti.
19. "non-adheren*".ab,ti.
20. "early discontinuation".ab,ti.
21. "discontinu*".ab,ti.
22. "persist*".ab,ti.
23. concordance.ab,ti.
24. "complian*".ab,ti.
25. "noncomplian*".ab,ti.
26. "non-complian*".ab,ti.
27. "continu*".ab,ti.
28. 8 or 9 or 10 or 11 or 12 or 13 or 14 or 15 or 16 or 17 or 18 or 19 or 20 or 21 or 22 or 23 or 24 or 25 or 26 or 27
29. "adjuvant hormon* therap*".ab,ti.
30. "hormon* therap* ".ab,ti.
31. AHT.ab,ti.
32. AHTs.ab,ti.
33. tamoxifen.ab,ti.
34. exp TAMOXIFEN/
35. exp Aromatase Inhibitors/
36. "aromatase inhibitor* ".ab,ti.
37. "adjuvant endocrine therap*".ab,ti.
38. AET.ab,ti.
39. anastrozole.ab,ti.
40. letrozole.ab,ti.
41. exemestane.ab,ti.
42. "anticancer agent* ".ab,ti.
43. exp Antineoplastic Agents/
44. "endocrine therap* ".ab,ti.
45. "estrogen antagonist* ".ab,ti.
46. exp Estrogen Antagonists/
47. exp Selective Estrogen Receptor Modulators/
48. "selective estrogen receptor modulator* ".ab,ti.
49. SERM.ab,ti.
50. "cancer adjuvant therap*".ab,ti.
51. toremifene.ab,ti.
52. exp TOREMIFENE/
53. 29 or 30 or 31 or 32 or 33 or 34 or 35 or 36 or 37 or 38 or 39 or 40 or 41 or 42 or 43 or 44 or 45 or 46 or 47 or 48 or 49 or 50 or 51 or 52
54. 7 and 28 and 53
55. limit 54 to (english language and yr="1998 -Current")
56. "estrogen block* ".ab,ti.
57. "estrogen receptor block* ".ab,ti.
58. 56 or 57
59. 53 or 58
60. 7 and 28 and 59
61. limit 60 to (english language and yr="1998 -Current")
62. 8 or 9 or 10 or 12 or 13 or 14 or 15 or 22 or 23 or 24 or 27
63. 11 or 16 or 17 or 18 or 19 or 25 or 26
64. 7 and 59 and 62
65. 7 and 59 and 63
66. limit 64 to (english language and yr="1998 -Current")
67. limit 65 to (english language and yr="1998 -Current")
68. 29 or 30 or 31 or 32
69. 33 or 34 or 35 or 36 or 37 or 38 or 39 or 40 or 41 or 44 or 45 or 46 or 47 or 48 or 49 or 50 or 51 or 52
70. 42 or 43
71. 7 and 28 and 68
72. 7 and 28 and 69
73. 7 and 28 and 70
74. limit 71 to (english language and yr="1998 -Current")
75. limit 72 to (english language and yr="1998 -Current")
76. limit 73 to (english language and yr="1998 -Current")

## Sheet: Table S2
Table S2. Complete study characteristics.
First Author (Year), Country	Sample Restrictions	N	Age (M) yrs	Recruit. Site	Study Designa	Mos on AHTs (M)	AHT	Outcome			% Adhered	% D/C	N tests	Theory /Model Used
								Variable	Measure	Definition
Aiello Bowles (2012), USA	Post-menopausal, non-metastatic	538	64.2	Research registry	Retro	n/r	All	Discontinuation	Self-report	Use < 5 years	-	18.2	53	No
									(validated with pharm record)
Ali (2017), Singapore	None	157	56.3	Hospital/clinic	Cross	n/r	All	Adherence	Self-report (MMAS-4)	Score=4	40.8	-	n/a	No
Atkins (2006), UK	Stable disease	131	59.4	Hospital/clinic	Cross	n/r	All	Intentional or nonintentional nonadherence	Self-report (interview)	Ever missing or forgetting pills	43.5	-	3	No
Bender (2014), USA	Non-metastatic	91	56.7	Hospital/clinic	Pro (18 mos)	Initiators (0)	All	Adherence	MEMS caps	% days taken correctly	96 (M 1st mo)	-	38	Yes
Bhatta (2013), USA	Non-metastatic	197	58.1	Clinical registry	Cross	n/r	All	Compliance	Self-report adherence + chart-verified persistence	≥80% pills, use for 5 years	87.7	-	4	No
Bluethmann (2017), USA	Older (65+), non-metastatic	990	72.6	Hospital/clinic	Pro (84 mos)	Initiators (0)	All	Discontinuation	Self-report (interview)	Stopping <5 years	-	43 (5 yrs)	3	No
Boonstra (2013), The Netherlands	Non-metastatic	57	58	Hospital/clinic	Cross	26	AIs	Adherence	Self-report (MARS)	Score=0	67	-	1	No
Brett (2018), UK	None	211	63	Research registry	Cross	n/r	All	Intentional nonadherence, Nonintentional nonadherence	Self-report (MARS-5) + additional items	Score ≥4	78	-	n/a	Yes
Brier (2017), USA	Post-menopausal, non-metastatic	437	n/r	Hospital/clinic	Retro	n/r	AIs	Adherence	Chart review of physician notes	Treatment interruption or d/c	78.8	-	4	Yes
Brier (2018), USA	Post-menopausal, non-metastatic	509	n/r	Hospital/clinic	Pro (18 mos)	12	AIs	Adherence	Chart review of physician notes	Treatment interruption or d/c	71.7	-	3	No
Bright (2016), USA	None	1371	56	Research registry	Cross (2 wks)	24	All	Adherence	Self-report (MMAS-8)	n/r (measured continuously)	-	-	n/a	No
Bright (2018), USA	None	130	54.2	Hospital/clinic	Pro (3 mos)	Initiators (0)	All	Adherence	MEMS caps	% doses on schedule	86 (M)	-	16	No
Chim (2013), USA	Post-menopausal, non-metastatic	437	62	Hospital/clinic	Retro	26.7	AIs	Discontinuation	EMR review of physician notes	Stopping without restarting	-	11	1	No
Cluze (2012), France	Younger (≤40)	196	37	Insurance registry	Pro (28 mos)	Initiators (0)	TAM	Treatment interruption	Pharmacy records	2+ mos missed consecutively	42	-	n/a	No
Corter (2018), New Zealand	Non-metastatic	125	56	Hospital/clinic	Pro (3 mos)	Initiators (0)	All	Adherence	Self-report doses in last 30 days	No missed doses	64	-	n/a	No
														cont’d
First author (year), country	Sample restrictions	N	Age (M) yrs	Recruit. site	Study designa	Mos on AHTs (M)	AHT	Outcome			% adhered	% D/C	N tests	Theory /model used
								Variable	Measure	Definition
Cruz (2017), Brazil	None	31	55.4	Hospital/clinic	Cross	n/r	TAM	Adherence	Self-report (Morisky-Green)	Perfect score	25.8	-	7	No
Demissie (2001), USA	Older (55+), non-metastatic	303	67.7	Hospital/clinic	Pro (28 mos)	Initiators (0)	TAM	Discontinuation	Self-report (interview)	Report of stopping	-	15	n/a	No
Fink (2004), USA	Older (65+), non-metastatic	516	n/r	Hospital/clinic	Pro (24 mos)	Initiators (0)	TAM	Discontinuation	Self-report (interview)	Report of stopping	-	21	14	Yes
Font (2012), Spain	Non-metastatic	692	n/r	Hospital/clinic	Retro	Initiators	All	Adherence,	Self-report (interview),	No or few problems,	92,	-	3	No
								Adherence,	Chart review of physician notes,	n/s,	94.7,
								Adherence	Pharmacy records	PDC ≥80%	74.7
Friese (2013), USA	Non-metastatic	743	58.9	Clinical registry	Pro (48 mos)	n/r	All	Persistence	Self-report	Report taking in past week	-	16.9	3	No
Gao (2018), China	Non-metastatic	699	n/r	Research registry	Retro	n/r	All	Adherence	n/r	Interruptions <180 days & use for 5 years	63.1	-	5	No
Grunfeld (2005), UK	None	110	56.3	Clinical registry	Cross	33	TAM	Adherence	Self-report	Use all 7 days in past week	88	-	n/a	Yes
Hadji (2014), Germany	Post-menopausal	1916	65	Hospital/clinic	Pro (9 mos)	3-6 mos	Anas	Compliance	Self & physician report	Both sources report ≥80% pills taken	82 (pre) – 66 (post)b	-	4	No
Hagen (2019), Norway	Post-menopausal	138	58	Hospital/clinic	Pro (48-60 mos)	<12 mos	All	Discontinuation	Pharmacy record	>180 day gap before 54 mos	98 (MPR ≥80%)	38 (60 mos)	n/a	Yes
Henry (2017), USA	Post-menopausal, non-metastatic	115	62	Hospital/clinic	Pro (12 mos)	Initiators (0)	All	Discontinuation	Self-report	Report of still taking	-	34.8	n/a	No
Hershman (2010), USA	Non-metastatic	8769	n/r	Clinical registry	Retro	Initiators (0)	All	Adherence,	Pharmacy record,	MPR ≥80%,	72		2	No
								Discontinuation	Pharmacy record	180+ day gap		32
Hershman (2016), USA	Non-metastatic	523	n/r	Hospital/clinic	Pro (n/r)	Initiators (0)	All	Non-persistence	Pharmacy record	90+ day gap	-	18	n/a	No
Huiart (2012), France	Younger women (≤40)	246	36.9	Insurance registry	Pro (24 mos)	Initiators (0)	TAM	Discontinuation	Pharmacy record	3+ month gap	-	39.5	6	No
Huiart (2013), France	Older women (65+)	382	n/r	Insurance registry	Pro (48 mos)	Initiators (0)	AIs	Discontinuation	Pharmacy record	3+ month gap	-	24.7 (48 mos)	n/a	No
Hurtado de Mendoza (2018), USA	Non-metastatic	280	58.8	Hospital/clinic	Cross	n/r	All	Adherence	Self-report	Missing pills any day during past week	78.8	-	20	Yes
Iacorossi (2016), Italy	None	151	53	Hospital/clinic	Cross	27.2	All	Adherence	Self-report (MMAS-8)	Score 8=high adherence	n/r	-	11	No
Jacob Arriola (2014), USA	None	200	58.5	Hospital/clinic	Cross	n/r	All	Adherence	Self-report (MARS)	n/r (measured continuously)	n/r	-	3	Yes
														cont'd
First author (year), country	Sample restrictions	N	Age (M) yrs	Recruit. site	Study designa	Mos on AHTs (M)	AHT	Outcome			% adhered	% D/C	N tests	Theory /model used
								Variable	Measure	Definition
Kahn (2007), USA	Non-metastatic	881	n/r	Clinical registry	Pro (48 mos)	Initiators (0)	TAM	Discontinuation	Self-report	Report of stopping	-	21	n/a	No
Karmakar (2017), USA	Post-menopausal	138	n/r	Clinical registry	Cross	n/r	AIs	Adherence	Self-report (MMAS-8)	Score > scale mean	62	-	7	Yes
Keim-Malpass (2019), USA	None	136	59.2	Hospital/clinic	Pro (24 mos)	Initiators (0)	All	Persistence (authors use term ‘adherence’)	Physician report (chart review)	Still using at 24 mos	-	20.6	1	No
Kimmick (2015), USA	Post-menopausal, non-metastatic	112	63.7	Hospital/clinic	Cross	35	All	Intentional nonadherence,	Self-report (MMAS),	Number of int. items reported,	66.1	-	18	Yes
								Unintentional nonadherence	Self-report (MMAS)	Number of unint. items
											41.1
Kroenke (2018), USA	Non-metastatic	2687	59.5	Hospital/clinic	Pro (60 mos)	Initiators (0)	All	Nonadherence,	Pharmacy record,	MPR ≥80%,	78		4	No
								Discontinuation	Pharmacy record	90+ day gap		24
Kuba (2018), Japan	None	234	57.9	Hospital/clinic	Pro (12 mos)	Initiators (0)	All	Adherence	Examining pill packets	Taking ≥80% of pills	85c	-	n/a	No
Lash (2006), USA	Older women (65+), non-metastatic	462	n/r	Hospital/clinic	Pro (60 mos)	Initiators (0)	TAM	Discontinuation	Self-report (interview)	Report of stopping	-	31 (60 mos)	16	No
Lee (2018), South Korea	Non-metastatic	210	50.3	Hospital/clinic	Cross	26.8	All	Adherence	Self-report (MMAS)	Score 8=“high” (assessed cont.)	25.7 (high)	-	7	Yes
Liu (2013), USA	Low income, non-metastatic	303	51.2	Hospital/clinic	Pro (30 mos)	Initiators (0)	All	Discontinuation	Self-report	Report of stopping	-	11.6	4	No
Livaudais (2012), USA	Women with DCIS	744	56.5	Clinical registry	Cross	n/r	All	Discontinuation	Self-report (interview)	Report of stopping	-	23	4	No
Llarena (2015), USA	Younger women (<45), non-metastatic	515	n/r	Clinical registry	Pro (up to 60 mos)	Initiators (0)	TAM	Non-persistence	Pharmacy record	Break >4 mos before 5 years	-	17.9	2	No
Manning (2011), USA	Rural women	213	n/r	Hospital/clinic	Pro (10 mos)	Initiators (0)	All	Adherence	Self-report of forgetting	Measured continuously	n/r	-	5	Yes
Markovitz (2016), USA	None	133	68.4	Hospital/clinic	Cross	n/r	All	Adherence	Self-report (MMAS)	Measured continuously	n/r	-	6	Yes
Moon (2017), UK	None	777	53	Hospital/clinic	Cross	n/r	TAM	Intentional nonadherence,	Self-report (MARS)	Score <20 (intent scale),	91	-	80	Yes
								Unintentional nonadherence	Self-report (MARS)	Score <5 (non-intent scale)	59
Nabieva (2018), Germany	Post-menopausal	3887	65	Hospital/clinic	Pro (12 mos)	Initiators (0)	let	Persistence	Self and physician report (chart review)	Report of stopping	-	14.6	12	No
Nestoruic (2016), Germany	None	111	55.5	Clinical registry	Pro (24 mos)	Initiators (0)	All	Adherence	Self-report	n/r	61.3	-	2	No
Pan (2018), Germany	None	116	55.4	Hospital/clinic	Pro (24 mos)	Initiators (0)	All	Adherence	Self-report (pills taken last week)	Taken ≥80% pills	85.3	-	2	No
Pinheiro (2017), USA	Non-metastatic	1599	n/r	Research registry	Pro (25 mos)	Initiators (0)	All	Nonadherence	Self-report (pills taken last week)	Taken <80% pills	81	-	3	No
														cont'd
First author (year), country	Sample restrictions	N	Age (M) yrs	Recruit. site	Study designa	Mos on AHTs (M)	AHT	Outcome			% adhered	% D/C	N tests	Theory /model used
								Variable	Measure	Definition
Quinn (2016), Ireland	None	261	57.9	Hospital/clinic	Cross	n/r	All	Adherence	Self-report (MMAS-8)	Perfect score	67.8	10.9	n/a	No
Schover (2014), USA	Early-stage	129	63.4	Clinical registry	Cross	n/r	AIs	Adherence	Self-report	(unclear reporting)	84.5	-	21	No
Sedjo (2011), USA	Commercially insured	13593	55.5	Insurance registry	Retro	n/r	AIs	Nonadherence	Prescription claims	MPR <80%	77	-	1	No
Sheppard (2014), USA	Older (65+), non-metastatic	1062	72.8	Hospital/clinic	Pro (84 mos)	Initiators (n/r)	All	Discontinuation	Self-report (interview)	Report of stopping	-	51.5 (5 yr)	10	No
Shinn (2019), USA	Non-metastatic	216	57.8	Hospital/clinic	Cross	36 mos (median)	All	Nonadherence	Self-report of missed doses	Missing >20% doses	n/r	18.5	91	No
Stahlschmidt (2019), Brazil	None	58	58.2	Hospital/clinic	Cross	22.8	All	Adherence	Self-report (MMAS-4)	Score=4	44	-	7	No
Stanton (2014), USA	None	1465	56	Research registry	Cross (2 wks)	28.8	All	Adherence,	Self-report (MMAS),	No cut-off,	n/r		20	No
								Non-persistence	Self-report	Reported no longer taking		6
Walker (2016), USA	Younger women (≤45)	106	38.5	Research registry	Pro (n/r)	24.7	All	Adherence	Self-report (MMAS) + pills taken in past wk	MMAS score=5 or 6, missing 0 pills	84 (missed 0 pills)	-	30	No
Wheeler (2019), USA	Non-metastatic	1280	53	Research registry	Cross	n/r	All	Nonadherence,	Self-report	Missed >2 pills last week,	91.1	10.4	n/a	Yes
								Discontinuation,	Self-report	Reported stopping
								Underuse (either non-adher or d/c)
Wickersham (2013), USA	Non-metastatic	198	59.1	Hospital/clinic	Pro (6 mos)	Initiators	All	Nonadherence	MEMS caps	<80% doses taken	88.7	-	12	Yes
Wouters (2013), The Netherlands	None	241	57.2	Hospital/clinic	Cross	n/r	All	Intentional nonadherence,	Self-report (items from MMAS & BMQ & author created)	n/r	91,	-	2	No
								Unintentional nonadherence
											85
Wouters (2014), The Netherlands	None	241	57	Hospital/clinic	Cross	n/r	All	Intentional nonadherence,	Self-report (items from MARS, MMAS, & author created)	Dichotomized (≥80 & <80%) of respondents for each	n/r	-	n/a	No
								Unintentional nonadherence
Wuensch (2015), Germany	None	281	51	Support groups	Cross	n/r	All	Adherence	Self-report	Not specified	n/r	-	n/a	No
Yi (2018), South Korea	None	110	53.6	Hospital/clinic	Cross	n/r	All	Adherence	Self-report	Not specified	92	-	n/a	No
Yin (2018), USA	Non-metastatic	1106	53.9	Clinical registry	Pro (60 mos)	Initiators (0)	All	Discontinuation	Prescription record	Report of stopping	-	44.4	n/a	No
Zeeneldin (2012), Egypt	None	139	50	Hospital/clinic	Cross	n/r	All	Adherence	Self-report pills taken in last month	Taking ≥80% of pills	94.2-95.7	-	1	No
														cont'd
First author (year), country	Sample restrictions	N	Age (M) yrs	Recruit. site	Study designa	Mos on AHTs (M)	AHT	Outcome			% adhered	% D/C	N tests	Theory /model used
								Outcome	% adhered	% D/C
Zeidan (2016), UK	Non-metastatic	165	57	Hospital/clinic	Cross	n/r	TAM	Adherence,	Self-report	Drug holiday,	91.5	13	n/a	No
								Discontinuation		Reported D/C
Ziller (2016), Germany	Post-menopausal	100	68.5	Hospital/clinic	Retro	15.1	All	Adherence	Prescription records	MPR ≥80%	79.2d	-	20	No
Note: D/C=discontinued, AI=aromatase inhibitor, AHT=adjuvant hormone therapy, TAM=tamoxifen, retro=retrospective, cross=cross-sectional, pro=prospective, MMAS=Morisky Medication Adherence Scale, mos=months, MEMS=microelectronic monitoring system, n/a=not applicable, n/r=not reported, MARS=medication adherence report scale MARS-5=medical adherence report scale, EMR=electronic medical record, yrs=y…

## Sheet: Table S3
Table S3. Complete study quality information.
First Author (Year)	Adherence /Discontinuation Defined	Complete Outcome Reporting	Inclusion /Exclusion Criteria Clearly Defined	Consecutive, Random, or Population-Based Sampling	Statistical Adjustment for Potential Confounders	Control for Multiple Comparisons
Aiello Bowles (2012)	Yes	Yes	Yes	Unclear	Yes	No
Ali (2017)	Yes	Unclear	Yes	Unclear	Yes	Yes
Atkins (2006)	Yes	Yes	Yes	Unclear	Yes	Yes
Bender (2014)	Yes	Yes	Yes	Unclear	No	Yes
Bhatta (2013)	Yes	Yes	Yes	Yes	Yes	Yes
Bluethmann (2017)	Yes	Yes	Yes	Unclear	Yes	Yes
Boonstra (2013)	Yes	Yes	Yes	Yes	No	N/A
Brett (2018)	Yes	Unclear	Yes	Yes	Yes	Yes
Brier (2017)	No	Yes	Yes	Unclear	Yes	Yes
Brier (2018)	Yes	Yes	Yes	Unclear	Yes	Yes
Bright (2016)	Yes	Unclear	Yes	Yes	Yes	Yes
Bright (2018)	Yes	Yes	Yes	Yes	No	Yes
Chim (2013)	Yes	Yes	Yes	Unclear	Yes	Yes
Cluze (2012)	Yes	Unclear	Yes	Unclear	Yes	Yes
Corter (2018)	Yes	Unclear	Yes	Unclear	Yes	Yes
Cruz (2017)	Yes	Yes	Yes	Unclear	No	No
Demissie (2001)	Yes	No	Yes	Yes	Yes	Yes
Fink (2004)	Yes	Yes	Yes	No	Yes	Yes
Font (2012)	Yes	Yes	Yes	Yes	Yes	No
Friese (2013)	Yes	Yes	Yes	Yes	Yes	Yes
Gao (2018)	Yes	Yes	Yes	Unclear	Yes	Yes
Grunfeld (2005)	Yes	No	Yes	Unclear	No	No
Hadji (2014)	Yes	Yes	Yes	Unclear	No	No
Hagen (2019)	Yes	Unclear	Yes	Yes	Yes	No
Henry (2017)	Yes	Unclear	Yes	Unclear	Yes	Yes
Hershman (2010)	Yes	Yes	Yes	Yes	Yes	Yes
Hershman (2016)	Yes	Unclear	Yes	Unclear	Yes	Yes
Huiart (2012)	Yes	Yes	Yes	Yes	No	Yes
Huiart (2013)	Yes	Unclear	Yes	Yes	Yes	Yes
Hurtado de Mendoza (2018)	Yes	Yes	Yes	Unclear	No	Yes
Iacorossi (2016)	Yes	Yes	Yes	Unclear	No	No
Jacob Arriola (2014)	Yes	Yes	Yes	Unclear	Yes	Yes
Kahn (2007)	Unclear	Unclear	Yes	Yes	Yes	Yes
Karmakar (2017)	Yes	Yes	Yes	Unclear	No	Yes
Keim-Malpass (2019)	Yes	Yes	No	Yes	No	No
Kimmick (2015)	Yes	Yes	Yes	Unclear	Yes	Yes
Kroenke (2018)	Yes	Yes	Yes	Yes	Yes	No
Kuba (2018)	Yes	Unclear	Yes	Unclear	No	Yes
Lash (2006)	Yes	Yes	Yes	Unclear	Yes	Yes
Lee (2018)	Yes	Yes	Yes	Yes	Yes	Yes
						cont'd…
First author (year)	Adherence /discontinuation defined	Complete outcome reporting	Inclusion /exclusion criteria clearly defined	Consecutive, random, or population-based sampling	Statistical adjustment for potential confounders	Control for multiple comparisons
Liu (2013)	Yes	Yes	Yes	Yes	Yes	Yes
Livaudais (2012)	Yes	Yes	Yes	Yes	Yes	Yes
Llarena (2015)	Yes	Yes	Yes	Yes	Yes	Yes
Manning (2011)	Yes	Yes	No	Unclear	Yes	No
Markovitz (2016)	Yes	Yes	Yes	Unclear	No	No
Moon (2017)	Yes	Yes	Yes	Unclear	Yes	Yes
Nabieva (2018)	Yes	Yes	Yes	Unclear	Yes	Yes
Nestoruic (2016)	No	Yes	Yes	Yes	No	No
Pan (2018)	Yes	Yes	Yes	Yes	Yes	Yes
Pinheiro (2017)	Yes	Yes	Yes	Yes	Yes	Yes
Quinn (2016)	Yes	Unclear	Yes	Unclear	Yes	Yes
Schover (2014)	Unclear	Yes	Yes	Yes	No	No
Sedjo (2011)	Yes	Yes	Yes	Yes	Yes	Yes
Sheppard (2014)	Yes	Yes	Yes	Yes	Yes	Yes
Shinn (2019)	Yes	Yes	Yes	Unclear	No	No
Stahlschmidt (2019)	Yes	Yes	Yes	Unclear	Yes	No
Stanton (2014)	Yes	Yes	Yes	Yes	Yes	Yes
Walker (2016)	Yes	Yes	Yes	Unclear	No	No
Wheeler (2019)	Yes	Unclear	Yes	Yes	Yes	Yes
Wickersham (2013)	Yes	Yes	Yes	Unclear	Yes	Yes
Wouters (2013)	No	Yes	Yes	Unclear	Yes	Yes
Wouters (2014)	Yes	Unclear	Yes	Unclear	Yes	Yes
Wuensch (2015)	No	No	Yes	Unclear	No	No
Yi (2018)	No	Unclear	Yes	Unclear	No	Yes
Yin (2018)	Yes	No	Yes	Yes	Yes	No
Zeeneldin (2012)	Yes	Yes	Yes	Unclear	Yes	N/A
Zeidan (2016)	Yes	Unclear	Yes	Yes	No	No
Ziller (2016)	Yes	Yes	Yes	Yes	No	No

## Sheet: Table S4
Table S4. Complete outcome information.
First author (year)	Factors investigated
	Whether expected association was found with adherence or discontinuation (yes/no), in a univariate (U) or multivariate (M) model,
	within each of the six categories of factors (attitudes, general, healthcare provider-related, psychological, side effects, or general)
Aiello Bowles (2012)	Attitudes: attributing side effects to hormone therapy (U = yes)
	Side effects: arthralgia (U = no), vasomotor (U = no), gynecological (U = no), sexual (U = no), sleep-related (U = no), headache (U = yes), GI (U = yes), weight gain (U = no), fluid retention (U = no), mood changes (U = no), hair thinning/loss (U = no), shortness of breath (U = no), dizziness (U = no), incontinence (U = no), breast sensitivity (U = no), bone-related changes (U = no). Note: all ex…
Ali (2017)	Side effects: presence (U = no)
Atkins (2006)	Attitudes: disliking aspects of treatment (U = yes, M = yes)
	Psych: locus of control (U = no)
Bender (2014)	Attitudes: efficacy beliefs (U = no), concerns (U = no)
	General: physical function (U = yes).
	Psych: depressive symptoms (U = yes), anxiety symptoms (U = yes)
	Side effects: total severity (U = no), arthralgia (U = yes), vasomotor (U = no), gynecological (U = yes), GI (U = no), weight gain (U = yes), cognitive (U = yes), bladder control (U = no)
	Sociocultural: social support (U = no). Note: all examined as baseline or time-dependent
Bhatta (2013)	Attitudes: perceived efficacy (U = yes, M = yes), concerns (U = no)
	HCP: valuation of HCP opinions (U = yes, M = yes)
	Psych: fear of cancer recurrence (U = no)
Bluethmann (2017)	Psych: perceived cognitive function (at baseline; U = yes, M = yes). Note: examined at 3 different time points
Boonstra (2013)	Side effects: arthralgia (U = no)
Brett (2018)	Intentional nonadherence		Unintentional nonadherence
	Attitudes: efficacy beliefs (U = yes), concerns (U = yes), beliefs about harm (U = no), beliefs about overuse (U = no)		Attitudes: efficacy beliefs (U = no), concerns (U = no), beliefs about harm (U = no), beliefs about overuse (U = no)
	Side effects: presence (U = yes)		Side effects: presence (U = no)
Brier (2017)	Attitudes: perceived efficacy/necessity (U = no), concerns (U = yes, M = yes)
	Psych: perceived susceptibility to cancer (U = no)
	Side effects: arthralgia (U = yes, M = no)
Brier (2018)	Psych: depressive symptoms (U = yes, M = yes), perceived ageing (U = yes, M = yes)
	Side effects: arthralgia (U = yes, M = no)
Bright (2016)	Attitudes: necessity belief (M = yes), negative emotions (M = yes)
	General: general barrier (M = yes), side effect-related barrier (U = yes), general facilitator (M = no), side-effect management strategy (U = no)
	HCP: relationship quality (M = yes)
Bright (2018)	HCP: relationship quality (U = no)
	Psych: depressive symptoms (U = yes, M = yes), approach-oriented coping (U = no), avoidant coping (U = no)
	Sociocultural: social support (U = no), material support (U = no)
Chim (2013)	Side effects: arthralgia (U = yes, M = yes)
Cluze (2012)	General: quality of life – physical function (U = no)
	HCP: information received sufficient (U = no), information received understandable (U = yes, M = yes), role in decision making (U = no)
	Psych: depressive symptoms (U = no), fear of recurrence (U = yes, M = yes)
	Side effects: vasomotor (U = no), reporting >2 menopausal symptoms (U = yes, M = yes), gynecological (U = no), sleep-related (U = no), GI (U = no), fluid retention (U = yes), mood changes/distress (U = no), visual disturbances (U = no)
	Sociocultural: social support (U = yes, M = yes). Note: all examined within early or late interruption
	cont’d…
First author (year)	Factors investigated
	Whether expected association was found with adherence or discontinuation (yes/no), in a univariate (U) or multivariate (M) model,
	within each of the six categories of factors (attitudes, general, healthcare provider-related, psychological, side effects, or general)
Corter (2018)	Psych: depressive symptoms (U = no), locus of control (U = no), fear of recurrence (U = no), control over treatment (U = yes, M = no), coherence (U = yes, M = yes), perceived sensitivity to medicine (U = no)
	Side effects: symptom count (U = yes, M = no), symptom severity (U = yes, M = no)
Cruz (2017)	HCP: information received enough (U = no) Note: seven facets examined
Demissie (2001)	General: used books to help decision making (M = yes)
	Side effects: presence (M = yes), GI (U = yes), mood changes (U = yes), vision problems (U = yes)
Fink (2004)	Attitudes: decisional balance (U = yes, M = yes)
	General: general quality of life (U = no), QOL-physical functioning (U = no), general mental well-being (U = no)
	HCP: communication quality (U = no)
	Side effects: number of side effects (U = no)
Font (2012)	Self-report adherence	Physician-reported adherence		Pharmacy record adherence
	Side effects: presence (U = no)	Side effects: presence (U = no)		Side effects: presence (U = no)
Friese (2013)	Attitudes: positive beliefs about medications (U = no)
	HCP: information received sufficient (U = yes)
	Psych: fear of recurrence (U = yes, M = no)
Gao (2018)	Attitudes: efficacy beliefs (U = yes, M = yes)
	HCP: information received understandable (U = yes, M = no)
	Side effects: presence (U = yes, M = yes), severity (U = yes)
Grunfeld (2005)	Attitudes: necessity beliefs (U = yes), concerns over use (U = no), beliefs about harm (U = no), beliefs about overuse (U = no)
	General: quality of life (U = no) note, assessed multiple domains
	Side effects: vasomotor (U = no)
Hadji (2014)	Side effects: arthralgia (U = yes). Note: assessed at 3 time points
Hagen (2019)	HCP: information received sufficient (U = no)
	Side effects: severity (U = no), arthralgia (U = no), GI (U = no), pseudo-neurological (U = no)
	Sociocultural: social support (U = yes)
Henry (2017)	General: pre-existing pain (M = yes)
	Side effects: worsening pain (U = no)
Hershman (2010)	Adherence		Discontinuation
	General: longer prescription refill interval (U = yes, M = yes)		General: longer prescription refill interval (U = yes, M = yes)
Hershman (2016)	Attitudes: concerns over use (U = yes, M = yes), decisional balance (U = yes, M = 0), positive belief/attitude (U = yes, M = yes)
	General: quality of life (U = yes, M = yes), QOL-physical function (U = yes, M = yes), mental well-being (U = yes, M = yes), social QOL (U = yes, M = yes)
	HCP: quality of relationship (U = yes, M = no), preference for role in decision (U = yes, M = no)
	Psych: breast cancer-specific distress (U = yes, M = yes)
	Sociocultural: social support (U = yes, M = no), emotional support (U = yes, M = no), tangible support (U = yes, M = no). Note: all assessed at baseline or follow-up
Huiart (2012)	General: QOL-physical function (U = no), mental wellbeing (U = no), social QOL (U = no)
	Psych: depressive symptoms (U = no)
	Sociocultural: social support (U = yes, M = yes), material support (U = yes)
Huiart (2013)	General: complementary and alternative medicine use (U = yes, M = yes)
	HCP: participation in decision-making (U = no)
	Psych: depressive symptoms (U = no)
	cont'd
First author (year)	Factors investigated
	Whether expected association was found with adherence or discontinuation (yes/no), in a univariate (U) or multivariate (M) model,
	within each of the six categories of factors (attitudes, general, healthcare provider-related, psychological, side effects, or general)
Hurtado de Mendoza (2018)	Attitudes: concerns over use (M = yes), decisional balance (M = yes), positive beliefs (M = yes), intention to take (M = yes)
	Psych: locus of control (M = no), self-efficacy (M = yes)
	Sociocultural: perceived norms (M = yes)
Iacorossi (2016)	Side effects: presence (U = no), arthralgia (U = no), vasomotor (U = no), gynecological (U = no), sexual (U = no), sleep-related (U = no), weight gain (U = no), cognitive (U = yes)
Jacob Arriola (2014)	Attitudes: necessity belies (U = yes), concerns (U = yes)
	HCP: communication frequency (U = yes)
Kahn (2007)	HCP: participation in decision (U = yes, M = yes), being told about side effects (U = yes, M = yes), perceived support (U = yes, M = yes)
	Side effects: severity (U = yes, M = yes), vasomotor symptoms (U = no, M = yes), gynecological (U = yes, M = no)
Karmakar (2017)	Attitudes: efficacy beliefs (U = yes), concerns (U = yes),
	Psych: susceptibility (U = no), self-efficacy (U = yes, M = yes), protection motivation (U = yes)
Keim-Malpass (2019)	General: health literacy (U = no)
Kimmick (2015)	Intentional nonadherence		Unintentional nonadherence
	Attitudes: necessity beliefs (U = no), concerns (U = yes, M = no)		Attitudes: necessity beliefs (U = no), concerns (U = yes, M = no)
	HCP: perceived efficacy in interactions (U = yes, M = no)		HCP: perceived efficacy in interactions (U = yes, M = no)
	Psych: self-efficacy (U = yes, M = yes)		Psych: self-efficacy (U = yes, M = yes)
	Side effects: severity (U = yes, M = no), arthralgia (U = yes), vasomotor (U = no), sleep-related (U = yes)		Side effects: severity (U = no, M = no), arthralgia (U = no), vasomotor (U = no), sleep-related (U = no)
Kroenke (2018)	Adherence		Discontinuation
	HCP: perceived clinical support (M = yes)		HCP: perceived clinical support (M = yes)
	Sociocultural: social support (M = yes)		Sociocultural: social support (M = yes)
Kuba (2018)	Attitudes: decisional balance (U = yes)
	General: using a strategy to help stay on medications (U = no), using a strategy to help alleviate side effects (U = no)
	HCP: consulting with HCP when having difficulty (U = yes) Note: was assessed for 3 types of HCPs, only sig. with nurses
	Psych: fear of recurrence (U = no)
	Side effects: presence (U = no)
Lash (2006)	Attitudes: decisional balance (U = no, M = yes)
	HCP: communication quality (U = no)
	General: general QOL (U = no), QOL-physical function (U = no), mental wellbeing (U = no)
	Side effects: presence (U = yes)
Lee (2018)	Attitudes: necessity beliefs (U = yes, M = yes), concerns (U = yes, M = yes)
	Psych: depressive symptoms (U = yes, M = yes), fear of recurrence (U = no), self-efficacy (U = yes, M = yes)
	Side effects: menopausal symptoms (U = no)
Liu (2013)	HCP: information received adequate (U = no, M = no), communication quality (U = yes, M = yes), perceived self-efficacy in communication (U = yes, M = yes)
	Side effects: presence (U = yes, M = yes)
Livaudais (2012)	HCP: participation in decision (M = no), strength of recommendation (M = yes)
Llarena (2015)	General: fertility concerns (U = yes, M = yes)
	Psych: anxiety/depression (composite variable; U = no)
Manning (2011)	Attitudes: positive attitude (U = yes), intention to take (U = yes)
	Psych: depressive symptoms (U = yes), perceived behavioural control (U = yes)
	Sociocultural: perceived social norms (U = yes)
	cont'd
First author (year)	Factors investigated
	Whether expected association was found with adherence or discontinuation (yes/no), in a univariate (U) or multivariate (M) model,
	within each of the six categories of factors (attitudes, general, healthcare provider-related, psychological, side effects, or general)
Markovitz (2016)	Psych: depressive symptoms (U = yes), internal locus of control (U = no)
	Side effects: cognitive symptoms (U = yes), general physical symptoms (U = yes)
	Sociocultural: social support (U = yes)
Moon (2017)	Intentional nonadherence		Unintentional nonadherence
	Attitudes: decisional balance (U = yes, M = yes), attribution of side effects to medications (U = yes, M = no), positive attitude (U = yes, M = no), intention to take medications (U = yes, M = no)		Attitudes: decisional balance (U = yes, M = no), attribution of side effects to medications (U = yes, M = no), positive attitude (U = no, M = no), intention to take medications (U = no, M = no)
	HCP: information received adequate (U = yes, M = no)		HCP: information received adequate (U = no)
	Psych: anxiety/depression (U = yes, M = no), internal locus of control (U = no, M = no), susceptibility beliefs (U = no, M = yes), perceived behavioural control (U = yes, M = yes), treatment control (U = no, M = no), coherence (U = no, M = no), emotional representations (U = no, M = no)		Psych: anxiety/depression (U = no), internal locus of control (U = no, M = no), susceptibility beliefs (U = no, M = no), perceived behavioural control (U = no, M = no), treatment control (U = no, M = no), coherence (U = no, M = no), emotional representations (U = no, M = no)
	Side effects: side effect severity (U = yes, M = no)		Side effects: side effect severity (U = yes, M = no)
	Sociocultural: perceived norms (U = yes, M = no)		Sociocultural: perceived norms (U = yes, M = no)
Nabieva (2018)	Side effects: presence (U = yes, M = yes), arthralgia (U = yes, M = yes), vasomotor (U = no, M = no), sleep-related (U = yes, M = yes)
Nestoruic (2016)	Attitudes: expected intensity of side effects (U = yes)
	Side effects: severity (U = yes)
Pan (2018)	Attitude: decisional balance (U = yes, M = yes), expected side effect intensity (U = yes, M = no)
	Psych: anxiety/depression (U = yes, M = no), expected coping (U = no, M = no)
	Side effects: severity (U = yes, M = yes)
Pinheiro (2017)	General: quality of life (U = yes, M = yes)
Quinn (2016)	General: used books to learn about medication (U = no, M = no), used the internet to learn about medication (U = yes, M = no)
	HCP: has knowledge about medication (U = no, M = no)
	Side effects: presence (U = yes, M = yes)
	Sociocultural: social support (U = no), emotional support (U = yes, M = yes)
Schover (2014)	General: sexual function (U = no), sexual interest (U = no), sexual distress (U = no)
	Side effects: arthralgia (U = no), vasomotor (U = no), gynecological (U = no), GI (U = no), weight gain (U = no), cognitive (U = no), bladder control (U = no)
Sedjo (2011)	Psych: depressive disorder (U = yes, M = yes)
Sheppard (2014)	HCP: participation in decision (U = no), communication quality (U = no), perceived ageism from HCP (U = yes), perception of physician’s knowledge of patient (U = yes), trust in physician (U = yes), perceived thoroughness of care (U = yes)
	Psych: optimism (U = yes)
	Sociocultural: emotional support (U = yes), material support (U = yes)
Shinn (2019)	Attitudes: concerns over use (U = yes), general dislike of medications (U = no)
	General: forgetting (U = no)
	Side effects: arthralgia (U = yes), vasomotor (U = yes), gynecological (U = yes), sexual (U = no), sexual (U = yes), sleep-related (U = yes), weight gain (U = yes), cognitive (U = yes), emotional distress (U = yes), worry about bone loss (U = yes). Note: each factor assessed at 7 different time points; marked as “yes” if associated at least 4/7 times
Stahlschmidt (2019)	General: physical functioning QOL (U = no), mental well-being (U = no), sexual enjoyment (U = no), body image (U = no)
	Side effects: severity (U = yes), hair loss (U = no)
	cont'd
First author (year)	Factors investigated
	Whether expected association was found with adherence or discontinuation (yes/no), in a univariate (U) or multivariate (M) model,
	within each of the six categories of factors (attitudes, general, healthcare provider-related, psychological, side effects, or general)
Stanton (2014)	Adherence		Non-persistence
	Attitudes: necessity beliefs (M = yes), concerns (M = no), positive emotions (M = no), negative emotions (M = yes)		Attitudes: positive emotions (U = yes, M = yes), negative emotions (U = yes, M = yes)
	HCP: relationship quality (M = yes)		HCP: relationship quality (U = yes, M = no)
	Psych: depressive symptoms (M = no), fear of recurrence (M = no), anxiety symptoms (M = no)		Psych: depressive symptoms (U = yes, M = yes), anxiety symptoms (U = yes, M = no)
	Side effects: severity (M = no)		Side effects: severity (U = no)
Walker (2016)	Attitudes: efficacy beliefs (U = no), concerns (U = no), attribution of side effects to medications (U = no), positive emotions (U = yes), negative emotions (U = yes). Note: 5 each of positive and negative emotions were examined, 2/5 of each were significant
	Psych: internal locus of control (U = no), fear of recurrence (U = no)
	Side effects: arthralgia (U = no), vasomotor (U = yes), gynecological (U = no), sexual (U = no), sleep-related (U = no), weight gain (U = no), cognitive (U = no), mood changes (U = no)
Wheeler (2019)	Nonadherence	Discontinuation		Underuse
	Attitudes: efficacy beliefs (U = yes, M = yes)	Attitudes: efficacy beliefs (U = yes, M = yes)		Attitudes: efficacy beliefs (U = yes, M = yes)
	HCP: role in decision making (U = no, M = no)	HCP: role in decision making (U = yes, M = yes)		HCP: role in decision making (U = yes, M = yes)
	Psych: susceptibility to cancer (U = yes, M = yes)	Psych: susceptibility to cancer (U = yes, M = yes)		Psych: susceptibility to cancer (U = yes, M = yes)
	Side effects: severity (U = no, M = no)	Side effects: severity (U = no, M = no)		Side effects: severity (U = no, M = no)
Wickersham (2013)	Psych: depressive symptoms (U = yes, M = no), anxiety (U = no)
	Side effects: severity (U = yes, M = no), arthralgia (U = yes, M = no), vasomotor (U = no), gynecological (U = yes, M = no), sleep-related (U = yes, M = no), GI (U = yes, M = no), weight gain (U = yes, M = yes), cognitive (U = yes, M = no), bladder control (U = no)
Wouters (2013)	Intentional nonadherence		Unintentional nonadherence
	Attitudes: decisional balance (U = yes, M = yes)		Attitudes: decisional balance (U = yes, M = yes)
Wouters (2014)	Intentional nonadherence		Unintentional nonadherence
	Attitudes: efficacy beliefs (M = no)		Attitudes: efficacy beliefs (U = no)
	General: practical problems (U = no)		General: practical problems (M = yes)
	Psych: self-efficacy for taking medications (U = no), self-efficacy for learning about medications (M = yes)		Psych: self-efficacy for taking medications (M = yes), self-efficacy for learning about medications (U = no)
	Side effects: number of side effects (M = yes)		Side effects: number of side effects (U = no)
Wuensch (2015)	HCP: enough information received (U = no)
	Side effects: number of side effects (U = yes), side effects severity (U = yes), newly occurring depressive symptoms (U = yes)
	Sociocultural: social support (U = yes) Note: from friends but not family
Yi (2018)	Side effects: pain (U = no), increase in pain (U = yes), menopausal symptoms (U = no)
Yin (2018)	General: used strategies to help alleviate side effects (U = yes), used the internet to research (U = yes; increased risk of discontinuation)
	HCP: mentioning having a good relationship with HCP (U = yes)
	Side effects: mentioning side effects (U = yes)
Zeeneldin (2012)	Sociocultural: fasting during Ramadan (U = no)
Zeidan (2016)	Adherence		Discontinuation
	Side effects: severity (U = no)		Side effects: severity (U = no)
Ziller (2016)	General: quality of life (U = no)
	Side effects: arthralgia (U = no), vasomotor (U = no), gynecological (U = no), sexual (U = no), sleep-related (U = no), mood changes (U = no), anxiety (U = no)
Note: GI = gastrointestinal, AI = aromatase inhibitor, TAM = tamoxifen, HCP = healthcare provider, QOL = quality of life.
